# Supplementary material for: Association between body mass index and ready-to-eat food consumption among sedentary staff in Nay Pyi Taw union territory, Myanmar
Source: Springer Nature journal article supplement (doi:10.1186/s12889-020-8308-6), 2020-02-10
Supplement: MOESM1 [file 17666778]

**Body mass index and ready-to-eat food consumption among sedentary staff in  
Nay Pyi Taw Union Territory, Myanmar**

**English questionnaire**

This questionnaire is only for research. The results will not be linked to individual respondent and will be kept confidential. Name of participant is not need to describe in detail. It is requested to answer all questions. Thank you for your participation.

Office use only

Code No.

Name of interviewer \_\_\_\_\_

Place of interview \_\_\_\_\_

Date of interview \_\_\_\_\_

**Part A. Background characteristics of respondents**

| No | Questions                               | Coding Categories                                                                                                                        |                       | Code |
|----|-----------------------------------------|------------------------------------------------------------------------------------------------------------------------------------------|-----------------------|------|
| A1 | How old were you at your last birthday? | Age (Completed years)<br><input style="width: 40px; height: 20px;" type="text"/> <input style="width: 40px; height: 20px;" type="text"/> |                       |      |
| A2 | Sex                                     | Male<br>Female                                                                                                                           | 1<br>2                |      |
| A3 | Designation                             | Senior officer<br>Mid-level officer<br>Officer<br><br>Others -----<br>(Specify)                                                          | 1<br>2<br>3<br><br>77 |      |

|     |                                                                      |                                                                                          |                                 |  |
|-----|----------------------------------------------------------------------|------------------------------------------------------------------------------------------|---------------------------------|--|
| A4  | Marital status                                                       | Single<br>Married<br>Divorced<br>Separated<br>Widow<br><br>Others -----<br>(Specify)     | 1<br>2<br>3<br>4<br>5<br><br>77 |  |
| A5  | Do you have any children?<br><b>(If absent, skip to question A7)</b> | Present<br>Absent<br>No response                                                         | 1<br>2<br>99                    |  |
| A6  | If present, how many children do you have?                           | -----                                                                                    |                                 |  |
| A7  | Type of family                                                       | Nuclear<br>Extended<br><br>Others -----<br>(Specify)                                     | 1<br>2<br><br>77                |  |
| A8  | Monthly income of family<br>(Kyats)                                  | ----- (Kyats)                                                                            |                                 |  |
| A9  | Do you usually travel on weekends and gazette holidays?              | Yes<br>No<br>Don't know<br>No response                                                   | 1<br>2<br>88<br>99              |  |
| A10 | Distance between residence and market places (in miles).             | -----[mile(s)]                                                                           |                                 |  |
| A11 | Transportation facilities                                            | On foot<br>Bike<br>Motorbike<br>Car<br>Public transport<br><br>Others -----<br>(Specify) | 1<br>2<br>3<br>4<br>5<br><br>77 |  |

|     |                                                                                                                     |                                                                                                                                    |                                                                        |  |
|-----|---------------------------------------------------------------------------------------------------------------------|------------------------------------------------------------------------------------------------------------------------------------|------------------------------------------------------------------------|--|
| A12 | Housemaid                                                                                                           | Present<br>Absent<br>No response                                                                                                   | 1<br>2<br>99                                                           |  |
| A13 | Have you ever drunk liquor?<br>(if not, skip to question A15)                                                       | Yes<br>No<br>Don't know<br>No response                                                                                             | 1<br>2<br>88<br>99                                                     |  |
| A14 | If drink liquor, how often did you drink?                                                                           | Socially<br>Monthly<br>Weekly<br>Weekends<br>Daily<br><br>Others -----<br>(Specify)                                                | 1<br>2<br>3<br>4<br>5<br><br>77                                        |  |
| A15 | Have you ever smoke?<br>(if not, skip to question A17)                                                              | Yes<br>No<br>Don't know<br>No response                                                                                             | 1<br>2<br>88<br>99                                                     |  |
| A16 | If smoked, how much cigarette/cigar/cheroot did you smoke per day?                                                  | Ten and above<br>Five to nine<br>One to four<br><br>Others -----<br>(Specify)                                                      | 1<br>2<br>3<br><br>77                                                  |  |
| A17 | Do you have a following diseases?<br>a. Hypertension<br><br>b. Ischemic heart diseases?<br><br>c. Diabetes mellitus | Yes<br>No<br>Don't know<br>No response<br><br>Yes<br>No<br>Don't know<br>No response<br><br>Yes<br>No<br>Don't know<br>No response | 1<br>2<br>88<br>99<br><br>1<br>2<br>88<br>99<br><br>1<br>2<br>88<br>99 |  |

|     |                                                                |                                                                                      |                                 |  |
|-----|----------------------------------------------------------------|--------------------------------------------------------------------------------------|---------------------------------|--|
| A18 | Do you do regular physical exercise?<br>(if not, skip to A 21) | Yes<br>No<br>Don't know<br>No response                                               | 1<br>2<br>88<br>99              |  |
| A19 | Average physical exercise doing minutes per week.              | ----- (Minutes)                                                                      |                                 |  |
| A20 | What type of physical exercise do you do?                      | Walking<br>Swimming<br>Stretching<br>Cycling<br>Gym<br><br>Others -----<br>(Specify) | 1<br>2<br>3<br>4<br>5<br><br>77 |  |
| A21 | What did you do in your leisure time?                          | -----                                                                                |                                 |  |
| A22 | Cooking role for the family                                    | Main role<br>Supportive role<br>Do not cook<br><br>Others -----<br>(Specify)         | 1<br>2<br>3<br><br>77           |  |

### B. Ready-to-eat food consumption of respondents

| No | Questions                                                                | Coding Categories                                                                                                                                                                                                           |                                           | Code |
|----|--------------------------------------------------------------------------|-----------------------------------------------------------------------------------------------------------------------------------------------------------------------------------------------------------------------------|-------------------------------------------|------|
| B1 | How frequent did you have ready-to-eat food?<br>(A single response only) | Never or less than once a month<br>One to three times per month<br>Once a week<br>Two to four times per week<br>Once per day<br>Two to three times per day<br>Four times and above per day<br><br>Others -----<br>(Specify) | 1<br>2<br>3<br>4<br>5<br>6<br>7<br><br>77 |      |
| B2 | How frequent did you have instant noodle?<br>(A single response only)    | Never or less than once a month<br>One to three times per month<br>Once a week<br>Two to four times per week<br>Once per day<br>Two to three times per day<br>Four times and above per day<br><br>Others -----<br>(Specify) | 1<br>2<br>3<br>4<br>5<br>6<br>7<br><br>77 |      |
| B3 | How frequent did you have confections?<br>(A single response only)       | Never or less than once a month<br>One to three times per month<br>Once a week<br>Two to four times per week<br>Once per day<br>Two to three times per day<br>Four times and above per day<br><br>Others -----<br>(Specify) | 1<br>2<br>3<br>4<br>5<br>6<br>7<br><br>77 |      |

|    |                                                                                                             |                                                                                                                                                                                                                             |                                           |  |
|----|-------------------------------------------------------------------------------------------------------------|-----------------------------------------------------------------------------------------------------------------------------------------------------------------------------------------------------------------------------|-------------------------------------------|--|
| B4 | How frequent did you have carbonated beverages?(non-alcoholic beverages)<br><b>(A single response only)</b> | Never or less than once a month<br>One to three times per month<br>Once a week<br>Two to four times per week<br>Once per day<br>Two to three times per day<br>Four times and above per day<br><br>Others -----<br>(Specify) | 1<br>2<br>3<br>4<br>5<br>6<br>7<br><br>77 |  |
| B5 | How frequent did you have instant mix?<br><b>(A single response only)</b>                                   | Never or less than once a month<br>One to three times per month<br>Once a week<br>Two to four times per week<br>Once per day<br>Two to three times per day<br>Four times and above per day<br><br>Others -----<br>(Specify) | 1<br>2<br>3<br>4<br>5<br>6<br>7<br><br>77 |  |
| B6 | Do you have a habit of eating out?                                                                          | No<br>Yes<br>Don't know<br>No response                                                                                                                                                                                      | 1<br>2<br>88<br>99                        |  |
| B7 | Reason of eating out                                                                                        | For fun<br>For change<br>For family recreation<br>For saving time<br><br>Others -----<br>(Specify)                                                                                                                          | 1<br>2<br>3<br>4<br><br>77                |  |
| B8 | Do you prefer for ready-to-eat food?                                                                        | Yes<br>No<br>Don't know<br>No response                                                                                                                                                                                      | 1<br>2<br>88<br>99                        |  |

|     |                                                             |                                                                                                                      |                            |  |
|-----|-------------------------------------------------------------|----------------------------------------------------------------------------------------------------------------------|----------------------------|--|
| B9  | How long have you ate ready-to eat food?                    | More than ten years<br>Five to ten years<br>One to four years<br>Less than one year<br><br>Others -----<br>(Specify) | 1<br>2<br>3<br>4<br><br>77 |  |
| B10 | When did you eat ready-to-eat food?                         | Breakfast<br>Lunch<br>Dinner<br>Supper<br><br>Others -----<br>(Specify)                                              | 1<br>2<br>3<br>4<br><br>77 |  |
| B11 | Do you usually eat ready-to eat on your free-time?          | Yes<br>No<br>Don't know<br>No response                                                                               | 1<br>2<br>88<br>99         |  |
| B12 | Do you use to buy and store ready-to-eat food in your home? | Yes<br>No<br>Don't know<br>No response                                                                               | 1<br>2<br>88<br>99         |  |

### **C. Measurement of the body weight and height of the respondents**

**Height** ----- (cm)

**Weight** ----- (kg)
